# Supplementary material
Source: Royal Society of Chemistry journal article supplement (doi:10.1039/d6qi00505e)
Supplement: d6qi00505e1.pdf [file d6qi00505e1.pdf]

## Electronic Supplementary Information

### Chelation of Radium with Double-Armed Benzo-Rigidified Macrocycles for Radiopharmaceutical Purposes

Anastasia D. Zubenko,<sup>\*a</sup> Anna V. Pashanova,<sup>a</sup> Lyubov S. Zamurueva,<sup>b</sup> Ekaterina V. Matazova,<sup>b</sup> Bayirta V. Egorova,<sup>b</sup> Ekaterina Y. Chernikova,<sup>a</sup> Valentina A. Karnoukhova,<sup>a</sup> Ivan V. Fedyanin,<sup>a</sup> Sofia P. Mosaleva, Yury V. Fedorov<sup>a</sup> and Olga A. Fedorova<sup>a</sup>

*a.* A. N. Nesmeyanov Institute of Organoelement Compounds of Russian Academy of Sciences, Vavilova St., 28, Moscow 119334, Russian Federation.

*b.* Lomonosov Moscow State University, Leninskie Gory, 1/3, Moscow 119991, Russian Federation.

\* Email: zubenko@ineos.ac.ru

#### Content

|                                                      |     |
|------------------------------------------------------|-----|
| 1. Mass spectra of complexes .....                   | S2  |
| 2. Potentiometric titration .....                    | S5  |
| 3. Cation exchange method .....                      | S10 |
| 4. X-ray crystallographic data .....                 | S14 |
| 5. NMR study .....                                   | S16 |
| 6. Radiolabeling and <i>in vitro</i> stability ..... | S20 |

## 1. Mass spectra of complexes

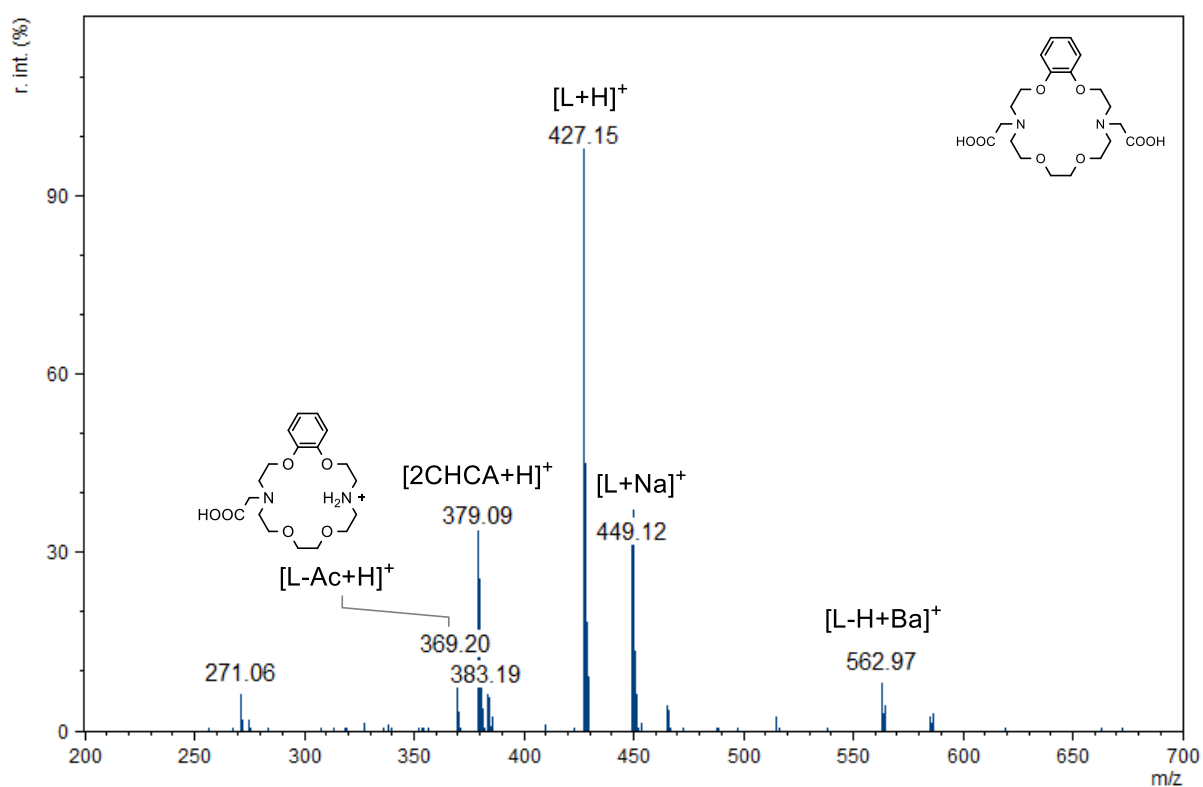

Figure S1. MALDI-TOF MS spectrum of BADA-18 in the presence of Ba<sup>2+</sup> in H<sub>2</sub>O using CHCA as a matrix.

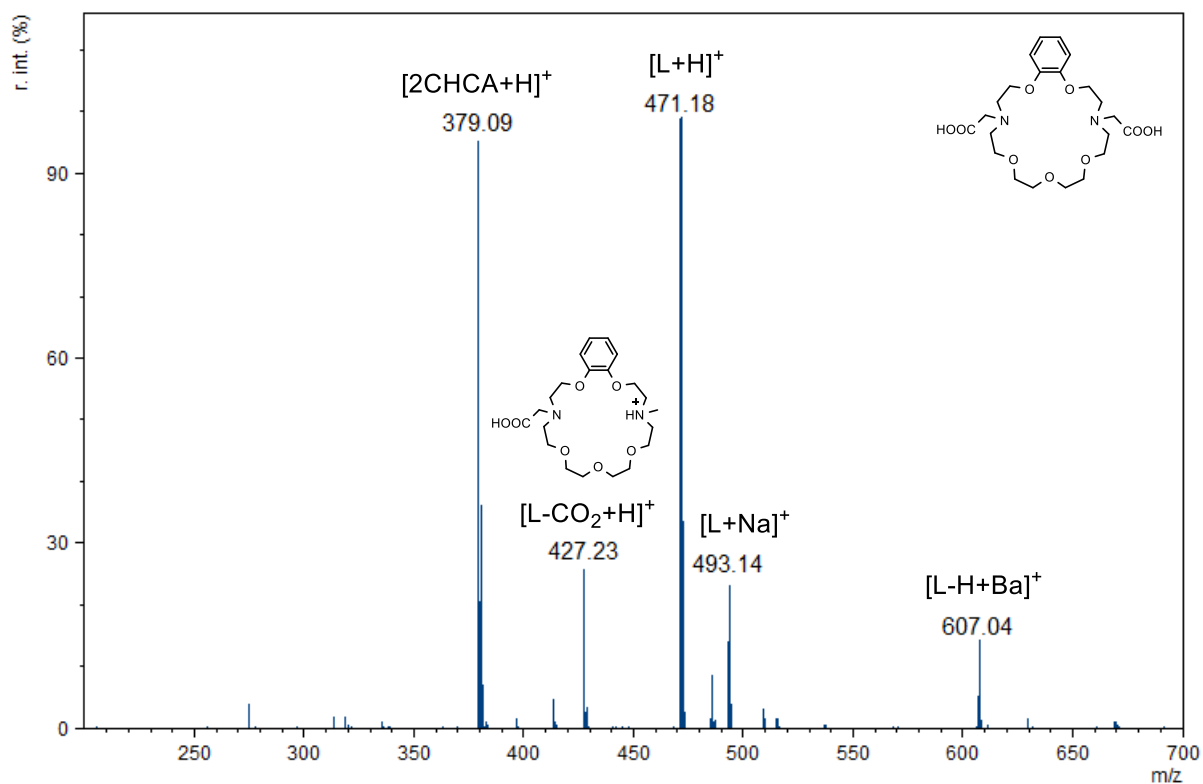

Figure S2. MALDI-TOF MS spectrum of BADA-21 in the presence of Ba<sup>2+</sup> in H<sub>2</sub>O using CHCA as a matrix.

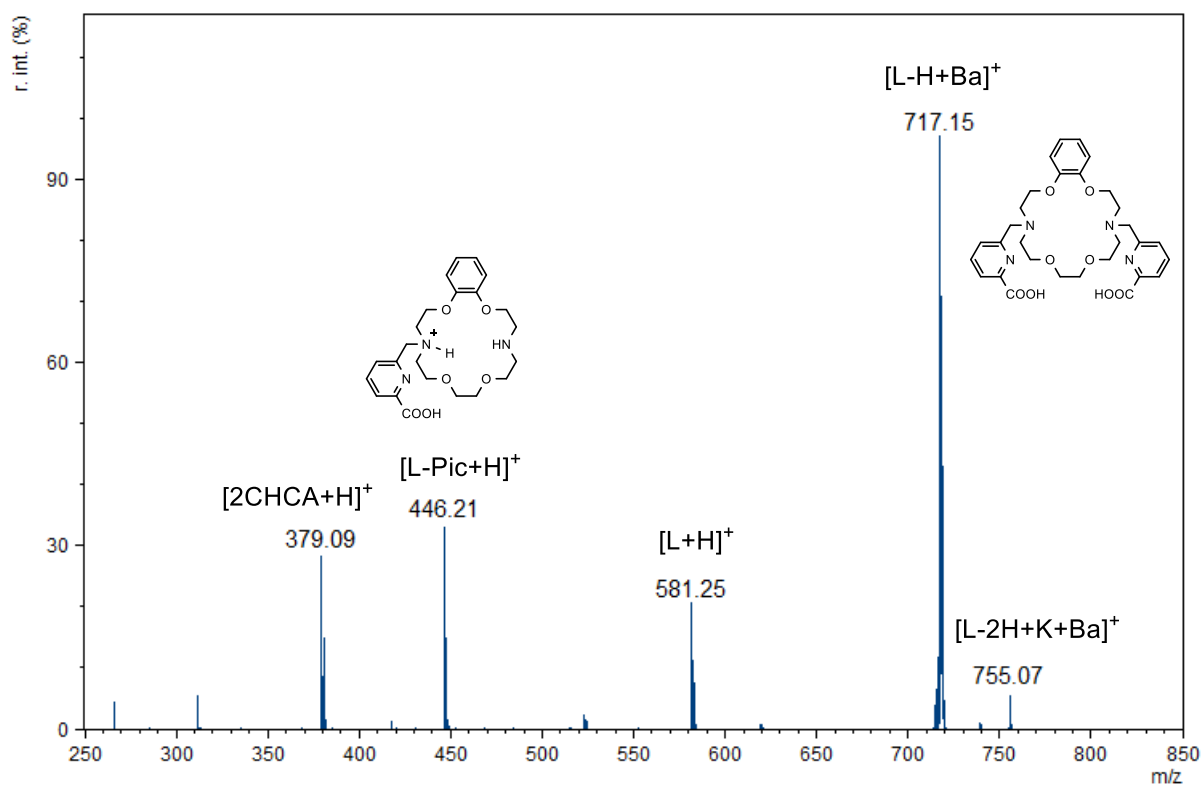

**Figure S3.** MALDI-TOF MS spectrum of BADPA-18 in the presence of  $\text{Ba}^{2+}$  in  $\text{H}_2\text{O}$  using CHCA as a matrix.

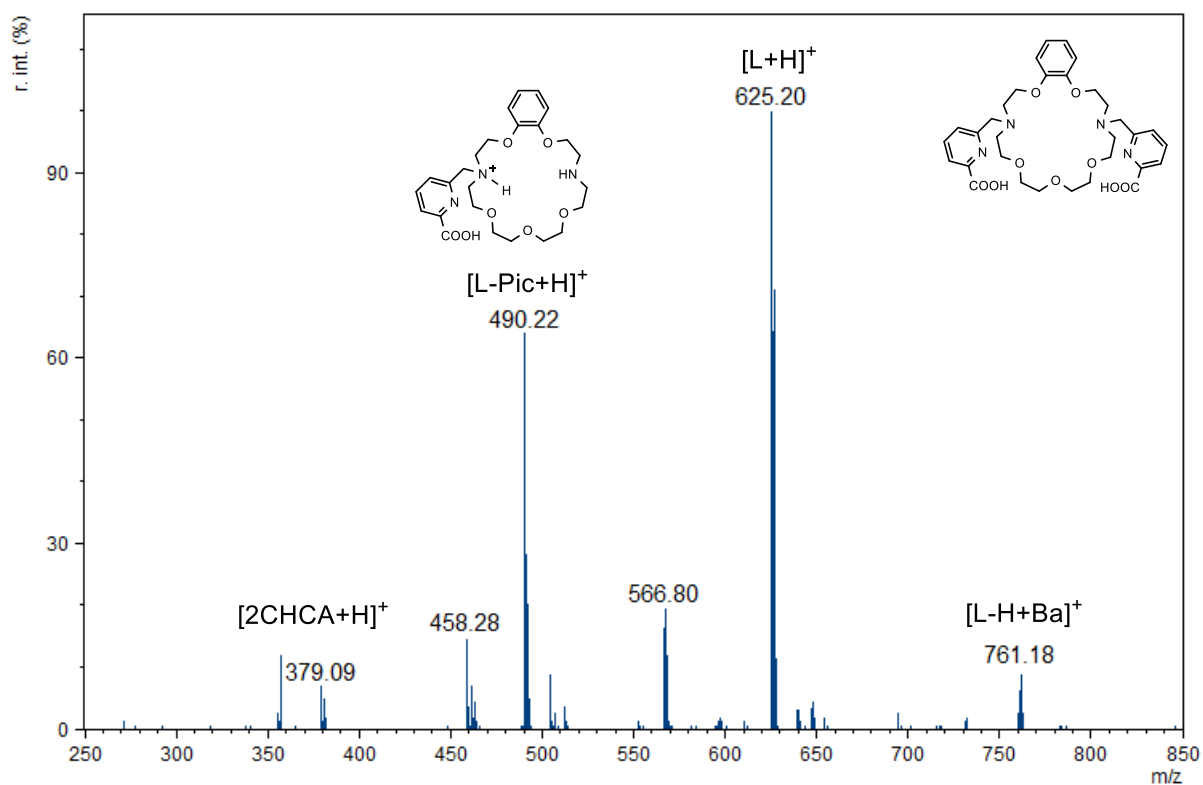

**Figure S4.** MALDI-TOF MS spectrum of BADPA-21 in the presence of  $\text{Ba}^{2+}$  in  $\text{H}_2\text{O}$  using CHCA as a matrix.

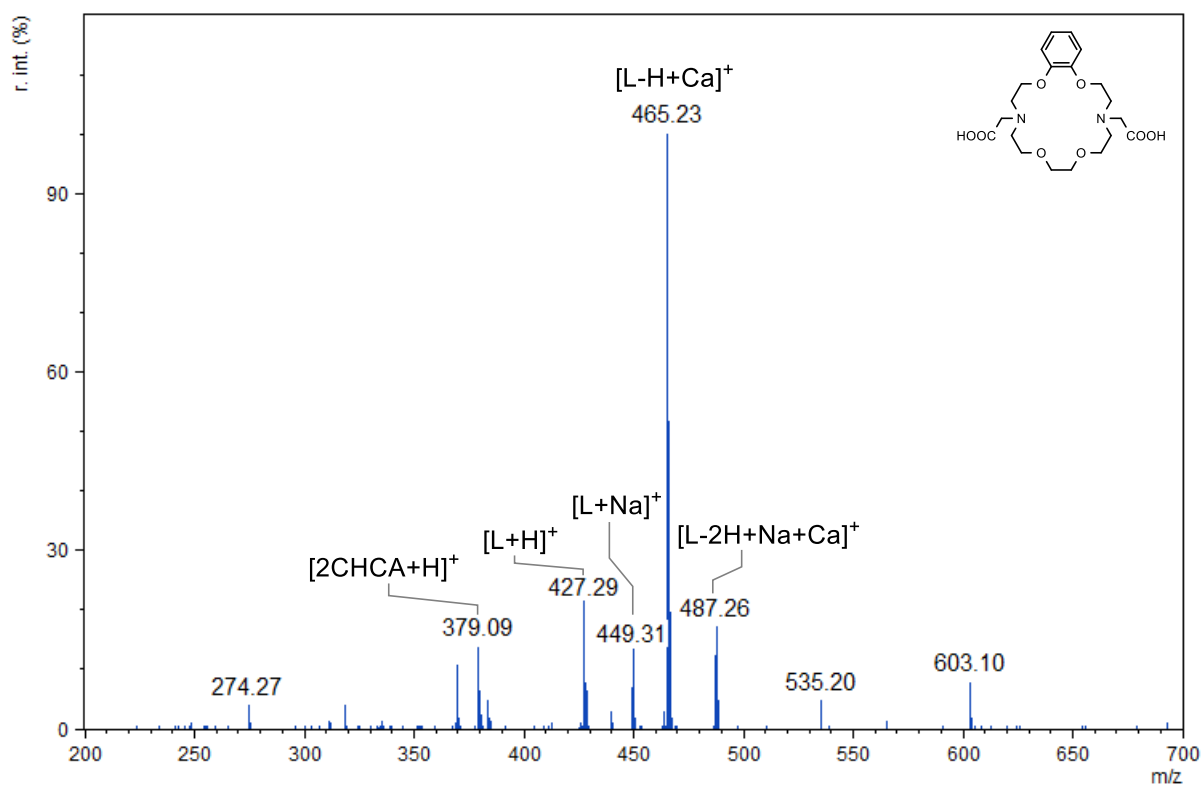

**Figure S5.** MALDI-TOF MS spectrum of BADA-18 in the presence of  $\text{Ca}^{2+}$  in  $\text{H}_2\text{O}$  using CHCA as a matrix.

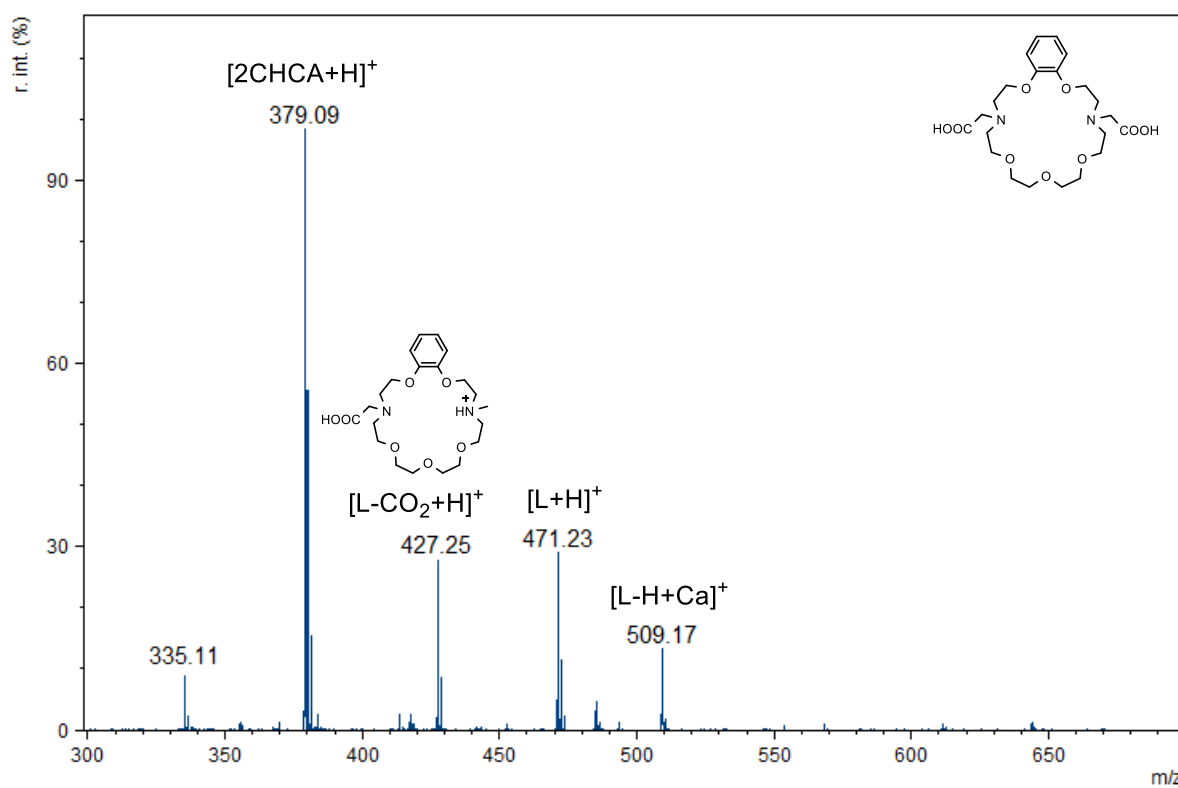

**Figure S6.** MALDI-TOF MS spectrum of BADA-21 in the presence of  $\text{Ca}^{2+}$  in  $\text{H}_2\text{O}$  using CHCA as a matrix.

## 2. Potentiometric titration

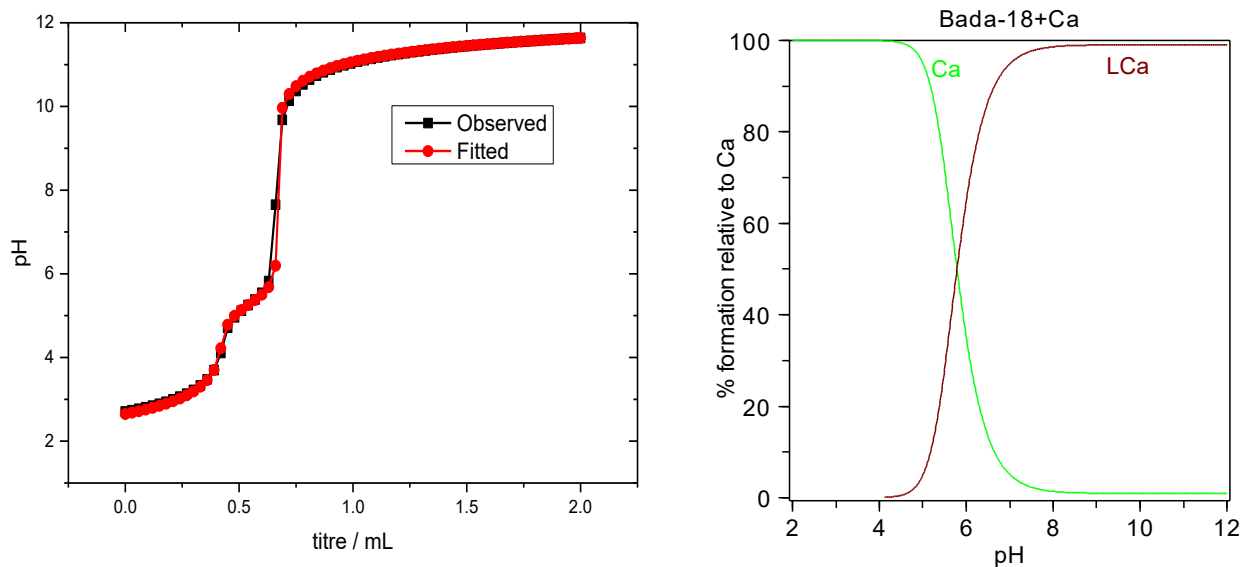

**Figure S7.** Potentiometric titration curves and species distribution diagram for the system  $\text{Ca}^{2+}$  (1 mM) and BADA-18 (1 mM) as a function of pH.

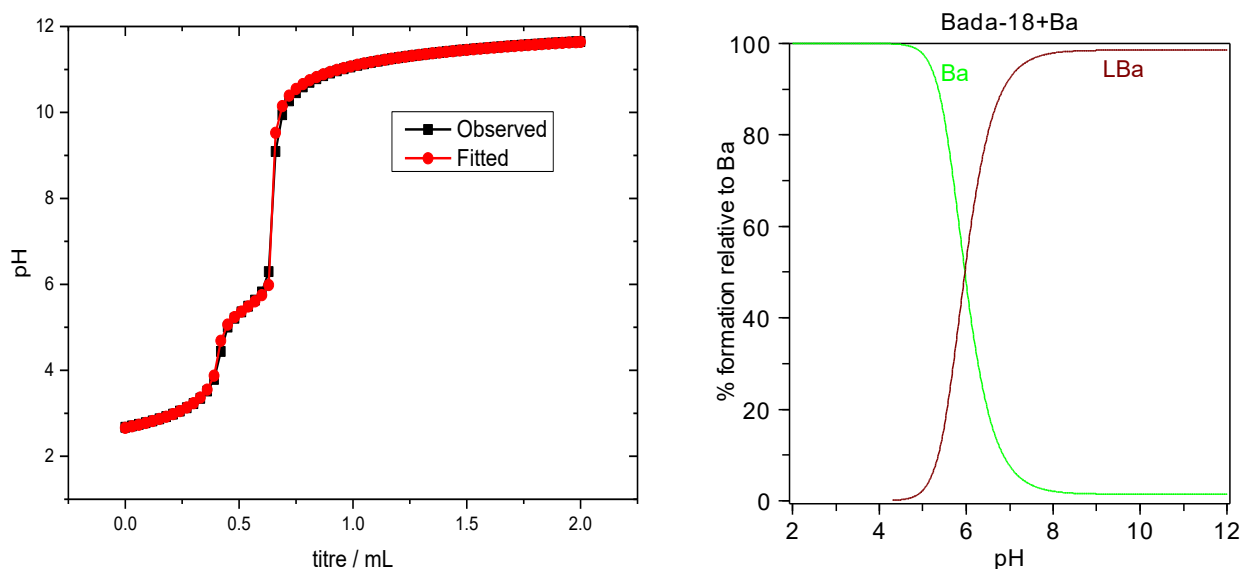

**Figure S8.** Potentiometric titration curves and species distribution diagram for the system  $\text{Ba}^{2+}$  (1 mM) and BADA-18 (1 mM) as a function of pH.

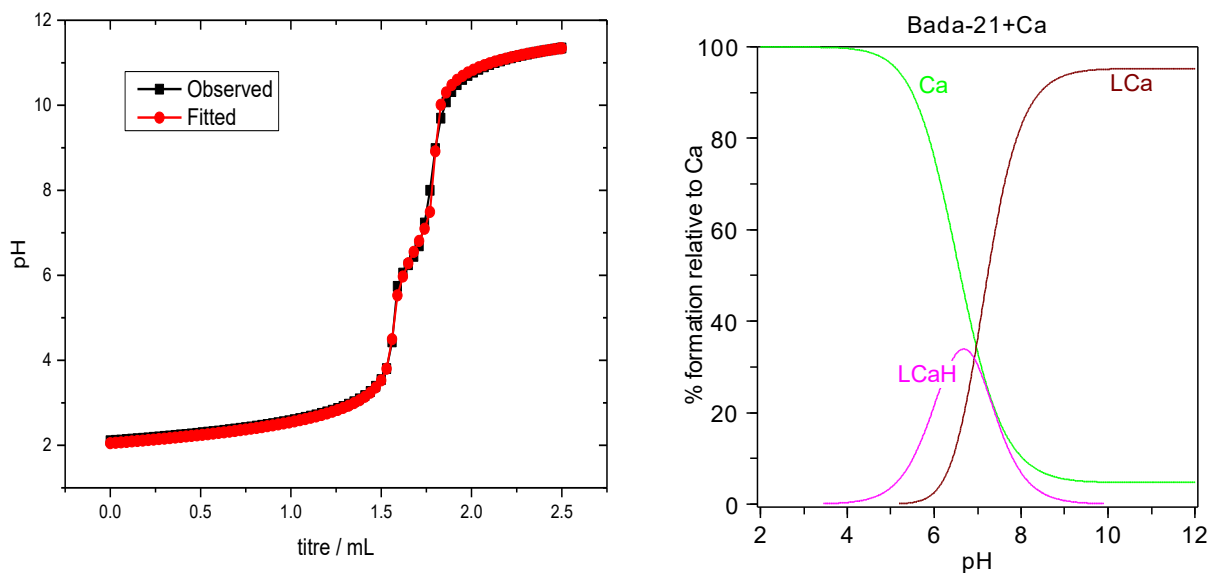

**Figure S9.** Potentiometric titration curves and species distribution diagram for the system  $\text{Ca}^{2+}$  (1 mM) and BADA-21 (1 mM) as a function of pH.

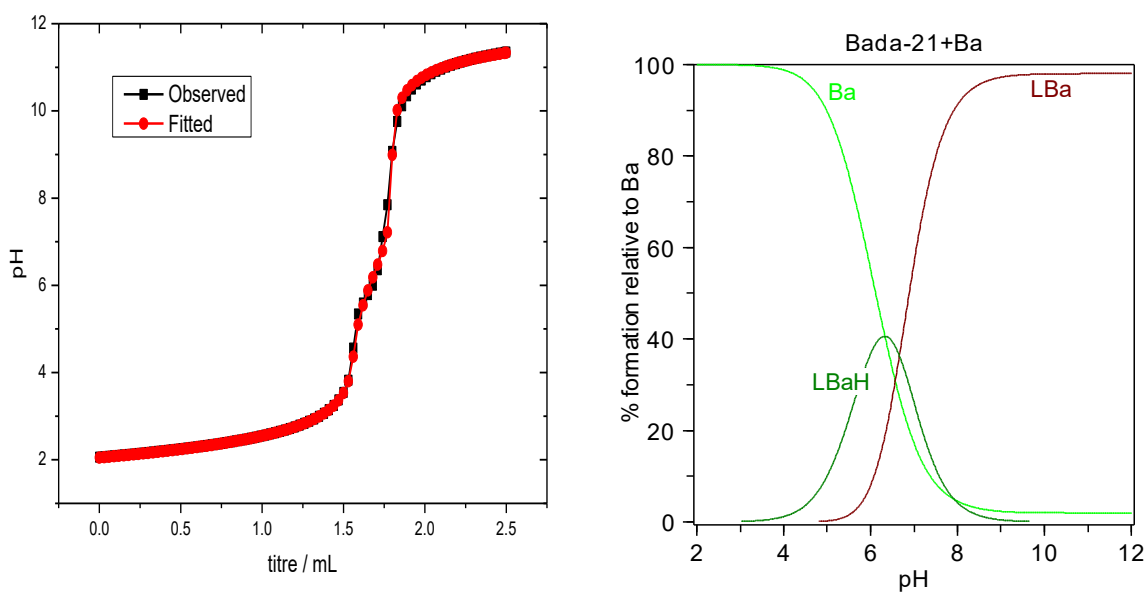

**Figure S10.** Potentiometric titration curves and species distribution diagram for the system  $\text{Ba}^{2+}$  (1 mM) and BADA-21 (1 mM) as a function of pH.

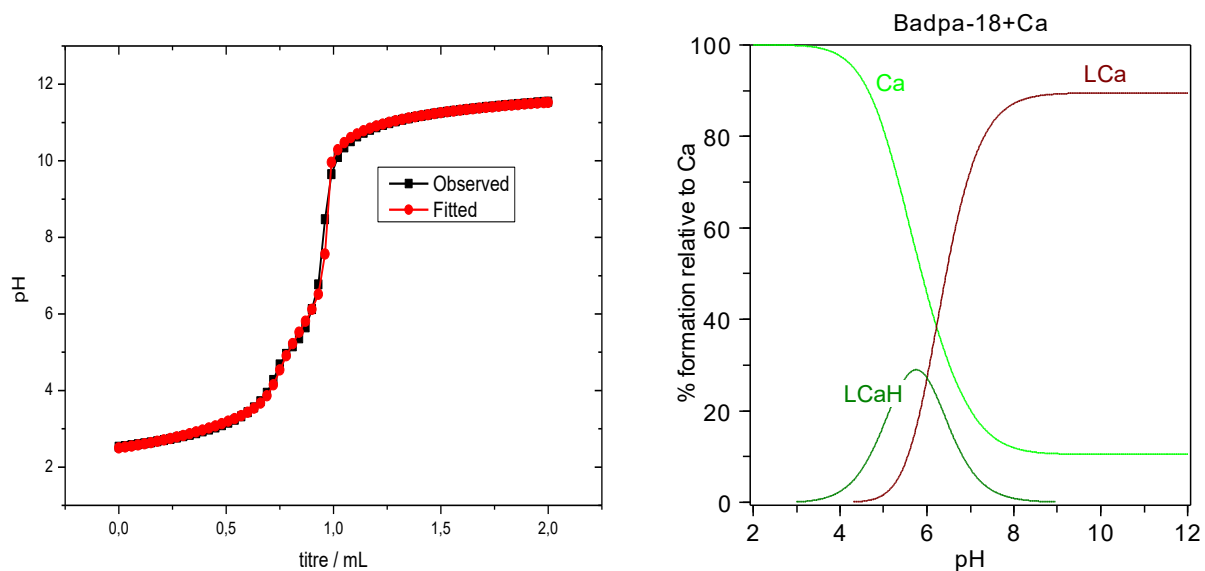

**Figure S11.** Potentiometric titration curves and species distribution diagram for the system  $\text{Ca}^{2+}$  (1 mM) and BADA-21 (1 mM) as a function of pH.

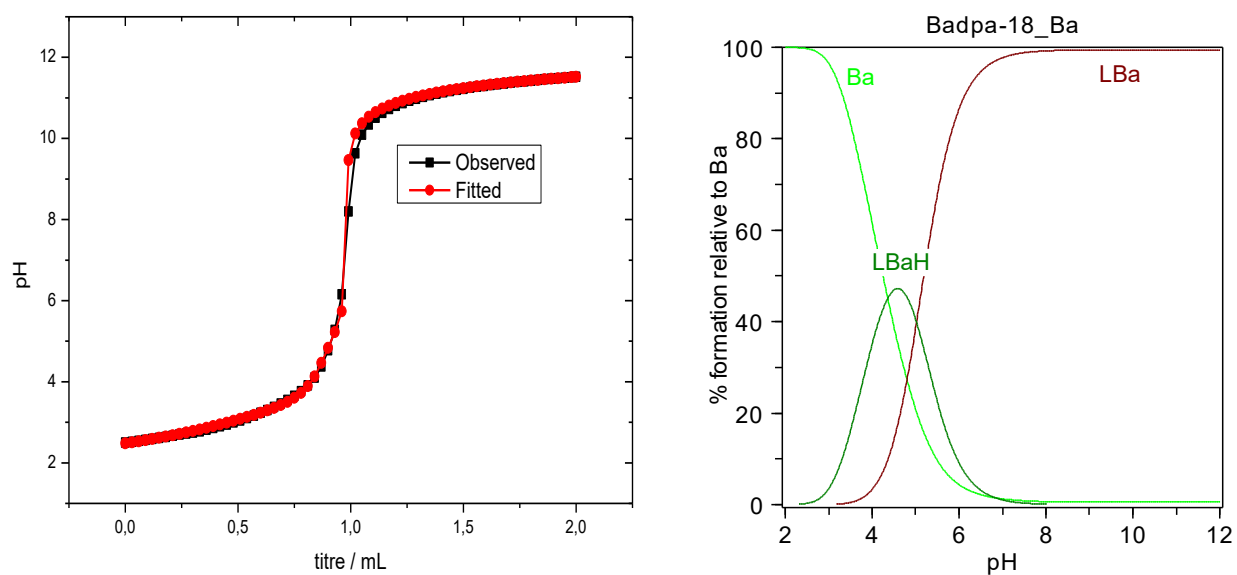

**Figure S12.** Potentiometric titration curves and species distribution diagram for the system  $\text{Ba}^{2+}$  (1 mM) and BADPA-18 (1 mM) as a function of pH.

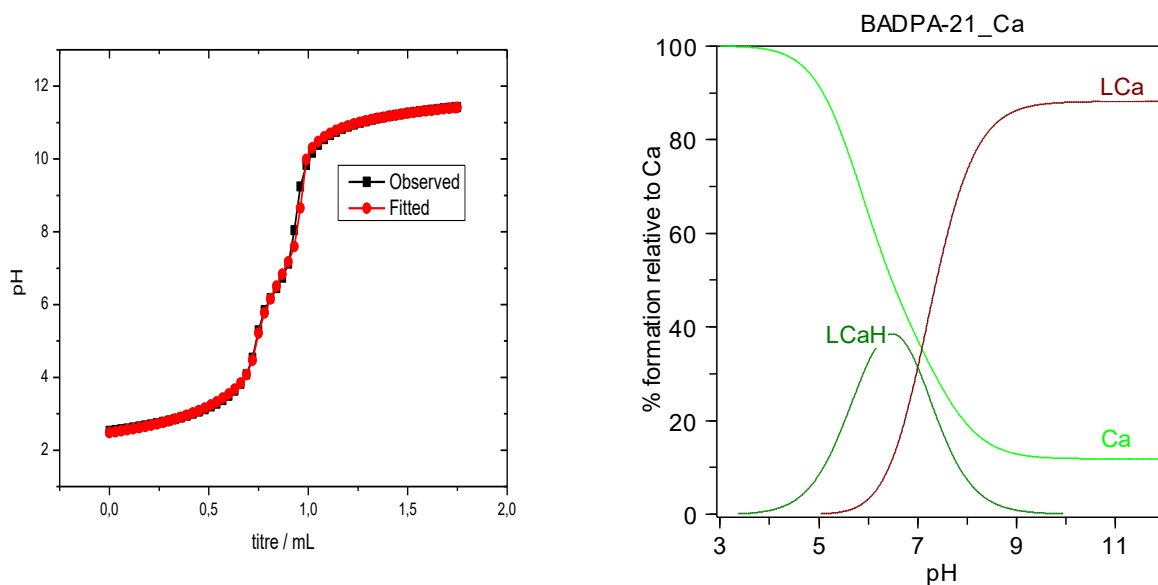

**Figure S13.** Potentiometric titration curves and species distribution diagram for the system  $\text{Ca}^{2+}$  (1 mM) and BADPA-21 (1 mM) as a function of pH.

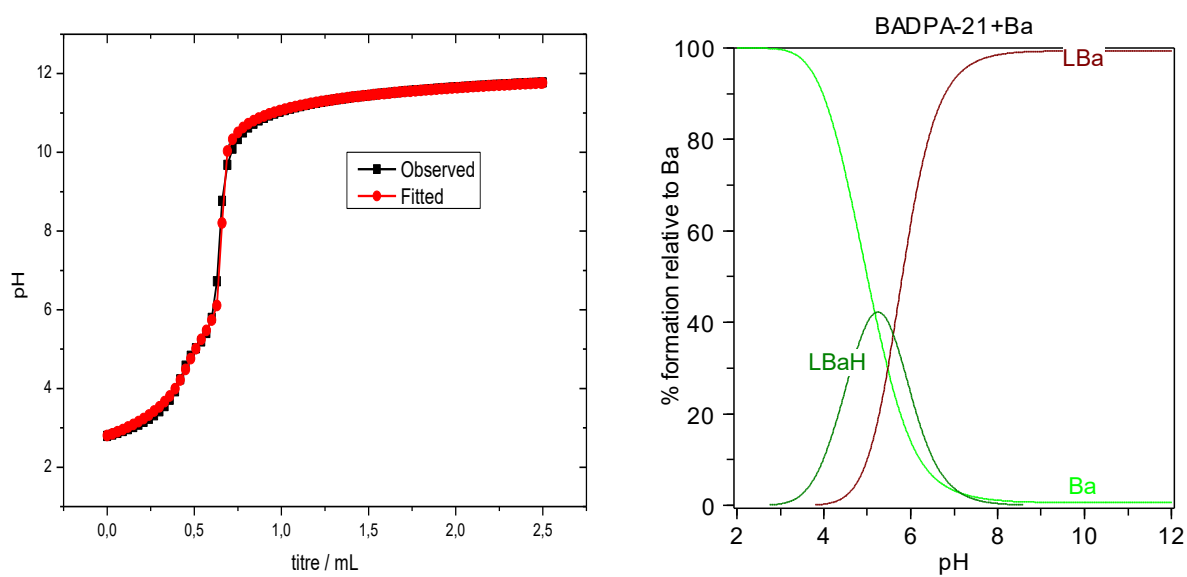

**Figure S14.** Potentiometric titration curves and species distribution diagram for the system  $\text{Ba}^{2+}$  (1 mM) and BADPA-21 (1 mM) as a function of pH.

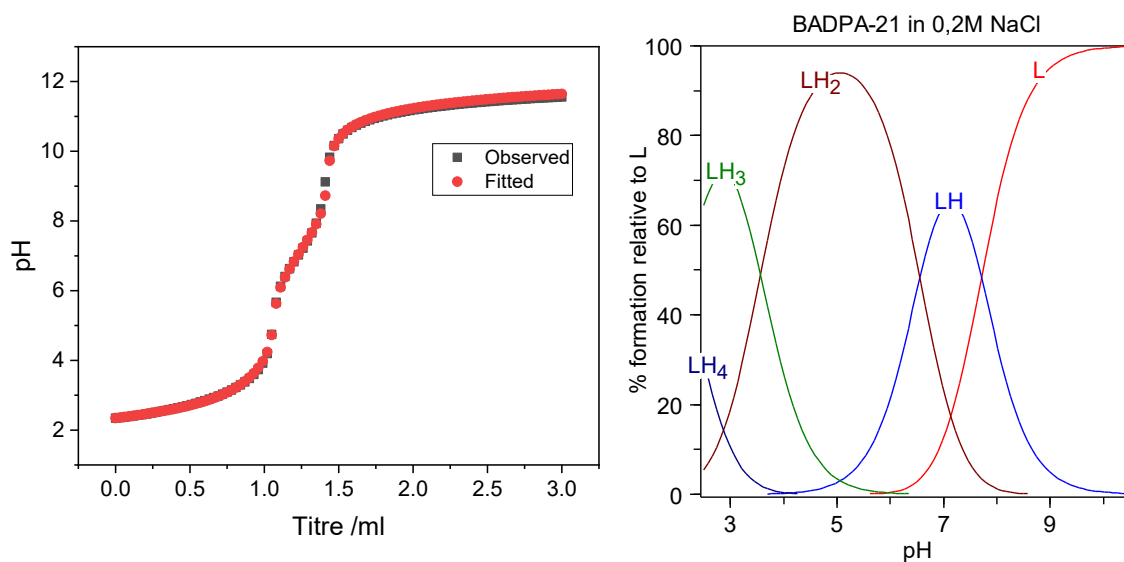

**Figure S15.** Potentiometric titration curves and species distribution diagram of BADPA-21 (1 mM) as a function of pH in 0.2 M NaCl.

**Table S1.** The protonation constants of BADPA-21 and macropa determined at 25 °C and I = 0.2 M NaCl.

|                 | BADPA-21 | Macropa <sup>a</sup> |
|-----------------|----------|----------------------|
| LH              | 7.71(4)  | 7.94(2)              |
| LH <sub>2</sub> | 6.57(4)  | 6.78(2)              |
| LH <sub>3</sub> | 3.57(5)  | 3.29(4)              |
| LH <sub>4</sub> | 2.17(5)  | 2.59(5)              |

<sup>a</sup> – Data from *Chem. Commun.*, 2022, 58, 9938–9941.

### 3. Cation exchange method

#### DATA treatment

The distribution coefficient D for sorption of resin can be expressed as:

$$D = \frac{\sum[M]_{sorb}}{\sum[M]_{aq}} \quad (1)$$

where M corresponds to  $Ra^{2+}$ .

For  $Ra^{2+}$  in the aqueous phase, the material balance equation is written as follows:

$$[M]_{aq} = [M^{2+}] + [M(OH)^{1+}] + [ML] \quad (2)$$

where L is BADPA-21 or macropa. The hydrolysis constant of  $Ra^{2+}$  is expressed as:

$$K_{M(OH)} = \frac{[M(OH)]}{[M^{2+}][OH]} \quad (3)$$

$$[M]_{aq} = [M^{2+}](1 + K_{M(OH)}[OH]) + [ML_n] \quad (4)$$

Stability constants are defined as:

$$\beta^{app} = \frac{[ML]}{[M^{2+}][L]^n} \quad (5)$$

Hence, for (4):

$$[M]_{aq} = [M^{2+}](1 + K_{M(OH)}[OH]) + [M^{2+}]\beta^{app}[L]^n \quad (6)$$

And finally:

$$D = \frac{[M]_{sorb}}{[M^{2+}](1 + K_{M(OH)}[OH]) + [M^{2+}]\beta^{app}[L]^n} \quad (7)$$

The total concentration of ligand  $c(L)$  is expressed as:

$$c(L) = [L](1 + \sum_{m=1}^4 K_{LH_m}[H]^m + \beta^{app}[M^{2+}]) \quad (8)$$

Taking into account the excess of the ligand compared to  $Ra^{2+}$ , we obtain:

$$\frac{D_0}{D} = 1 + \frac{\beta^{app}(c(L))^n}{(1 + K_{M(OH)}[OH])(1 + \sum_{m=1}^4 K_{LH_m}[H]^m)} \quad (9)$$

From the tangent of the slope of the  $(D_0/D - 1)$  dependence from  $c(L)$  the conditional stability constant can be obtained. Plotting in logarithmic coordinates  $\lg\left(\frac{D_0}{D} - 1\right) = f\{\lg(c(L))\}$  allow us to determine the stoichiometry of the complex by the tangent of the slope of the straight line, equal to  $n$ .

In current work we define conditional ("apparent") stability constants as:

$$\beta^{app} = \beta_{101} + \beta_{111} \times [H^+] \quad (10)$$

Where  $\beta_{101}$  corresponds to the stability constant of  $[RaL]$  form and  $\beta_{111}$  – to  $[RaHL]$ .

**Table S2.** The L:M stoichiometry provided by the slope of the linear regression analysis of  $\log(D_0/D-1)$  as a function of  $\log c(L)$  for complexes with macropa and BADPA-21.

|          | pH  | $c(L)$ , M                   | L:M ratio       |
|----------|-----|------------------------------|-----------------|
| macropa  | 5.9 | $(1.78-17.8) \cdot 10^{-6}$  | $1.09 \pm 0.05$ |
| BADPA-21 | 6.5 | $(4.44-35.6) \cdot 10^{-5}$  | $1.01 \pm 0.03$ |
|          | 7.0 | $(5.33-26.7) \cdot 10^{-5}$  | $0.95 \pm 0.03$ |
|          | 7.5 | $(0.889-13.3) \cdot 10^{-5}$ | $0.98 \pm 0.04$ |

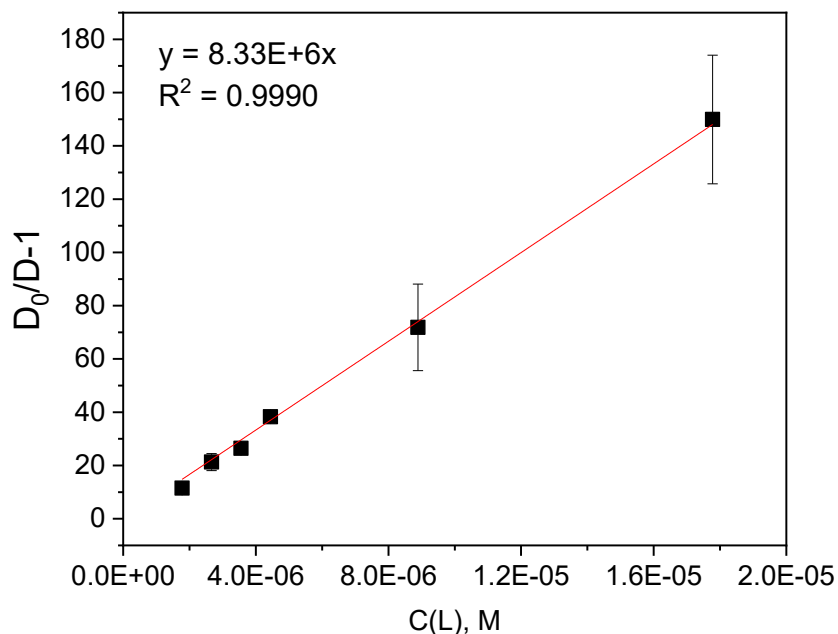

**Figure S16.** Determination of  $\beta_{app}$  for the  $Ra^{2+}$  complex with macropa from distribution data at pH 5.9. The value for  $\log \beta_{app}$  provided by the slope of the linear fit is 9.9(1). The data represents the average of at least three replicates. Error bars are shown when the uncertainty is larger than the symbol in the plot.

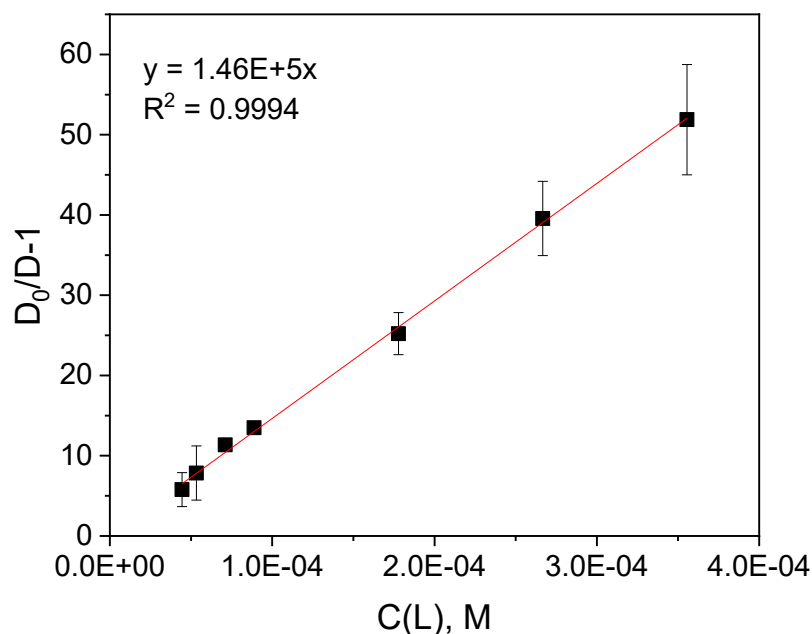

**Figure S17.** Determination of  $\beta_{app}$  for the  $Ra^{2+}$  complex with BADPA-21 from distribution data at pH 6.5. The value for  $\log \beta_{app}$  provided by the slope of the linear fit is 6.72(8). The data represents the average of at least three replicates. Error bars are shown when the uncertainty is larger than the symbol in the plot.

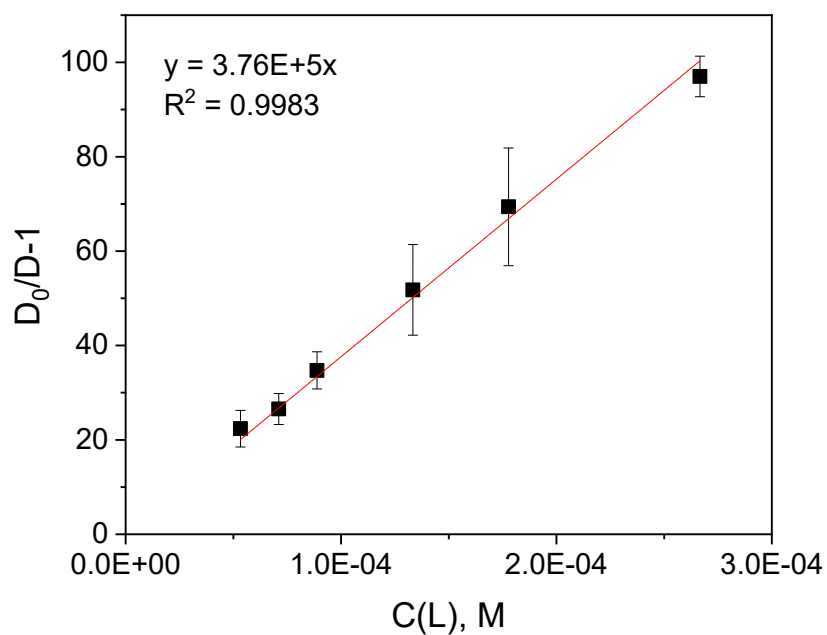

**Figure S18.** Determination of  $\beta_{app}$  for the  $Ra^{2+}$  complex with BADPA-21 from distribution data at pH 7.0. The value for  $\log \beta_{app}$  provided by the slope of the linear fit is 6.5(1). The data represents the average of at least three replicates.

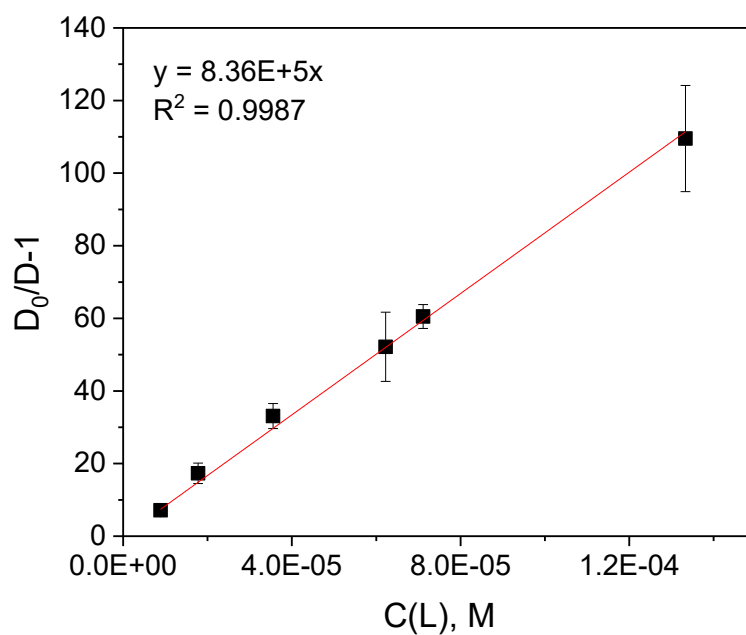

**Figure S19.** Determination of  $\beta_{app}$  for the  $Ra^{2+}$  complex with BADPA-21 from distribution data at pH 7.5. The value for  $\log \beta_{app}$  provided by the slope of the linear fit is 6.4(1). The data represents the average of at least three replicates. Error bars are shown when the uncertainty is larger than the symbol in the plot.

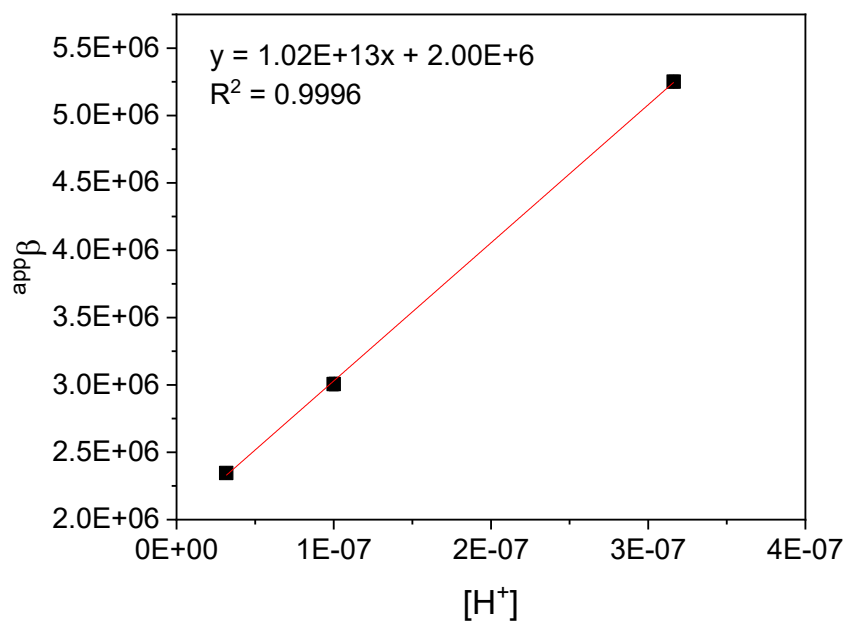

**Figure S20.**  $\beta_{app}$  dependence on  $[H^+]$ . Error bars are shown when the uncertainty is larger than the symbol in the plot.

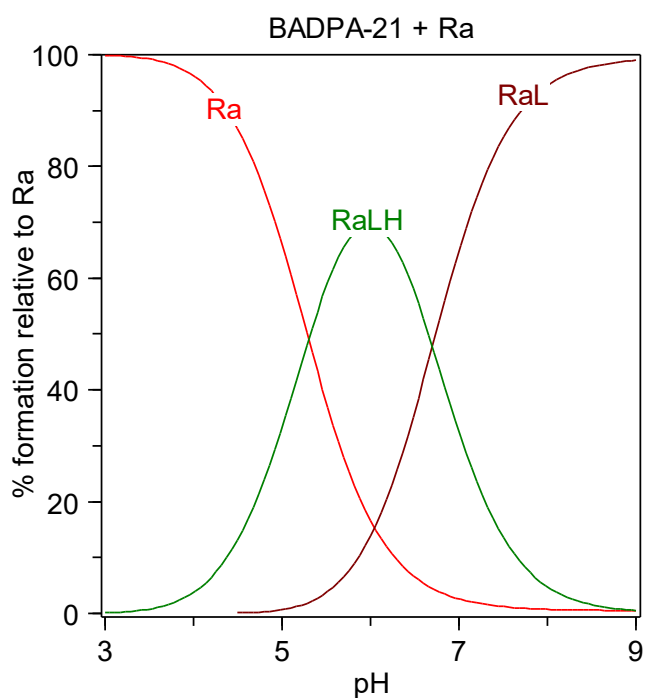

**Figure S21.** The species distribution diagram for the  $Ra^{2+}$  and BADPA-21 system as a function of pH. To make the species distribution diagram of radium species, the average concentrations of  $Ra^{2+}$  (0.75 nM) and BADPA-21 (0.1 mM) were used, which had been applied to determine the conditional stability constant.

## 4. X-ray crystallographic data

**Table S3.** Crystallographic data for BADPA-21 and [Ba(HBADPA-21)]ClO<sub>4</sub>.

|                                                                             | BADPA-21                                                       | [Ba(HBADPA-21)]ClO <sub>4</sub>                                    |
|-----------------------------------------------------------------------------|----------------------------------------------------------------|--------------------------------------------------------------------|
| CCDC                                                                        | 2532020                                                        | 2342556                                                            |
| Empirical formula                                                           | C <sub>32</sub> H <sub>62</sub> N <sub>4</sub> O <sub>20</sub> | C <sub>32</sub> H <sub>39</sub> BaClN <sub>4</sub> O <sub>13</sub> |
| Formula weight                                                              | 822.85                                                         | 860.46                                                             |
| T (K)                                                                       | 150                                                            | 100                                                                |
| Crystal system                                                              | Triclinic                                                      | Monoclinic                                                         |
| Space group                                                                 | P-1                                                            | P2 <sub>1</sub> /n                                                 |
| Z / Z'                                                                      | 2 / 1                                                          | 4 / 1                                                              |
| a, Å                                                                        | 9.4912(6)                                                      | 11.6375(7)                                                         |
| b, Å                                                                        | 14.1268(8)                                                     | 16.5145(9)                                                         |
| c, Å                                                                        | 15.9346(9)                                                     | 18.4211(11)                                                        |
| α, °                                                                        | 90.628(2)                                                      | 90                                                                 |
| β, °                                                                        | 102.940(2)                                                     | 100.934(3)                                                         |
| γ, °                                                                        | 100.709(2)                                                     | 90                                                                 |
| V, Å <sup>3</sup>                                                           | 2042.9(2)                                                      | 3476.0(4)                                                          |
| d <sub>calc</sub> (g cm <sup>-3</sup> )                                     | 1.338                                                          | 1.644                                                              |
| μ, cm <sup>-1</sup>                                                         | 1.11                                                           | 12.91                                                              |
| F(000)                                                                      | 884                                                            | 1744                                                               |
| 2θ <sub>max</sub> , °                                                       | 52.14                                                          | 58.00                                                              |
| Refls collected                                                             | 28927                                                          | 19566                                                              |
| Independent refls [ <i>R</i> <sub>int</sub> ]                               | 8067 [0.0584]                                                  | 9140 [0.0742]                                                      |
| Observed refls [ <i>I</i> > 2σ( <i>I</i> )]                                 | 5822                                                           | 6437                                                               |
| Parameters                                                                  | 565                                                            | 460                                                                |
| <i>R</i> 1                                                                  | 0.0606                                                         | 0.0645                                                             |
| <i>wR</i> 2                                                                 | 0.1456                                                         | 0.1643                                                             |
| GOF                                                                         | 1.038                                                          | 1.031                                                              |
| Residual density, Δρ <sub>max</sub> /Δρ <sub>min</sub> (e Å <sup>-3</sup> ) | 0.400/-0.329                                                   | 3.109/-2.164                                                       |

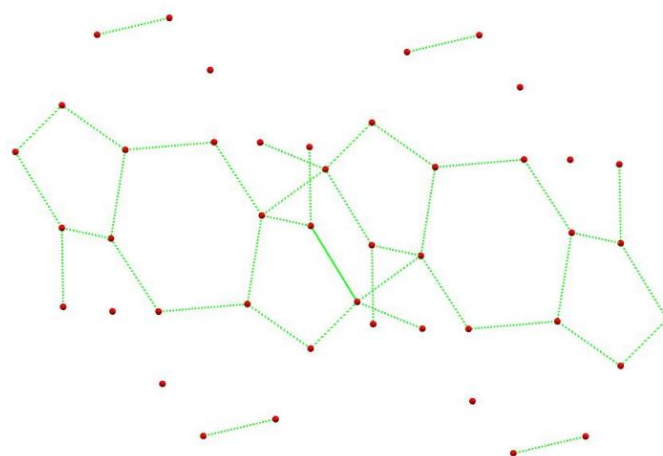

**Figure S22.** The hydrogen-bonded water clusters in the crystal structure of BADPA-21. Only the oxygen atoms of the water molecules are shown, and lines are drawn only between molecules participating in H-bonds with each other (unconnected molecules and pairs are H-bonded to the macrocycle).

**Table S4.** Hydrogen bonds for BADPA-21 (Å and °).

| D-H...A                | Bond length d(D...A) | Bond angle (DHA) |
|------------------------|----------------------|------------------|
| N(1)-H(1N)...O(10)#1   | 2.768(3)             | 173              |
| N(2)-H(2N)...O(11)#2   | 2.807(3)             | 161              |
| O(10)-H(10C)...O(9)#2  | 2.838(3)             | 165              |
| O(10)-H(10D)...O(6)#3  | 2.930(3)             | 168              |
| O(11)-H(11C)...O(9)#2  | 2.932(3)             | 178              |
| O(11)-H(11D)...O(12)   | 2.803(4)             | 159              |
| O(12)-H(12C)...O(8)#4  | 2.804(3)             | 175              |
| O(12)-H(12D)...O(6)#3  | 2.756(3)             | 166              |
| O(13)-H(13C)...O(8)#5  | 2.853(3)             | 164              |
| O(13)-H(13D)...O(7)#6  | 2.670(3)             | 161              |
| O(14)-H(14C)...O(15)#7 | 2.839(3)             | 173              |
| O(14)-H(14D)...O(13)   | 2.706(3)             | 169              |
| O(15)-H(15C)...O(18)#8 | 2.786(4)             | 154              |
| O(15)-H(15D)...O(16)#7 | 2.923(3)             | 156              |
| O(16)-H(16C)...O(6)#3  | 2.846(3)             | 164              |
| O(16)-H(16D)...O(19)   | 2.796(3)             | 169              |
| O(17)-H(17C)...O(8)#4  | 2.836(3)             | 171              |
| O(17)-H(17D)...O(16)   | 2.867(3)             | 177              |
| O(18)-H(18C)...O(17)   | 2.762(3)             | 170              |
| O(18)-H(18D)...O(14)   | 2.722(4)             | 162              |
| O(19)-H(19C)...O(9)#2  | 2.772(3)             | 161              |
| O(19)-H(19D)...O(15)   | 2.906(3)             | 153              |
| O(20)-H(20C)...O(3)    | 2.851(4)             | 179              |
| O(20)-H(20D)...O(18)#8 | 2.933(4)             | 180              |

Symmetry transformations used to generate equivalent atoms: #1  $x, y-1, z$ ; #2  $-x+1, -y+1, -z$ ; #3  $x, y+1, z$ ; #4  $-x+2, -y+1, -z$ ; #5  $x, y, z+1$ ; #6  $-x+2, -y, -z+1$ ; #7  $-x+1, -y+1, -z+1$ ; #8  $x-1, y, z$ .

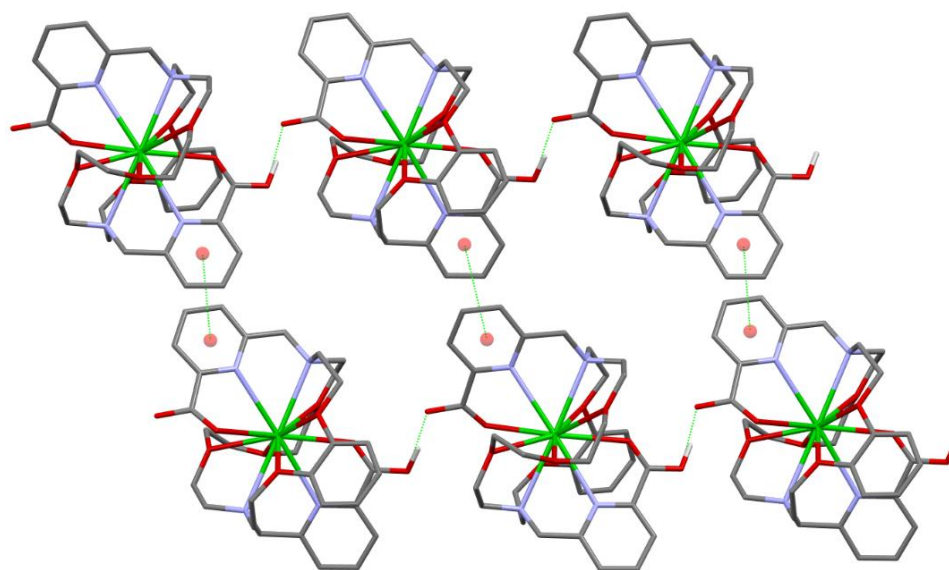

**Figure S23.** The supramolecular packing motif in the crystal structure of  $[\text{Ba}(\text{HBADPA-21})]\text{ClO}_4$ , built *via* H-bonds between the carboxyl and the carboxylate groups ( $\text{O7}\dots\text{O9}$  2.460(6) Å,  $\text{OHO}$  170°) and shifted  $\pi$ -stacks (shortest  $\text{C}\dots\text{C}$  3.934 Å). Perchlorate anions are not shown.

**Table S5.** SHAPE 2.1 Output values of the continuous shape measures (CSMs) (five lowest measures for each metal sphere).

| Complex                                       |           |          |          |          |         |
|-----------------------------------------------|-----------|----------|----------|----------|---------|
| Ba(HBADPA-21)                                 | JCPAPR-11 | JCPPR-11 | JAPPR-11 | JASPC-11 | EBPY-11 |
|                                               | 5.068     | 6.21     | 6.445    | 8.917    | 15.928  |
| Ba(Hmacropa-XL)<br>(CSD TIXGOA)               | JCPAPR-11 | JCPPR-11 | JASPC-11 | JAPPR-11 | EBPY-11 |
|                                               | 3.693     | 6.642    | 6.871    | 8.778    | 17.511  |
| Ba(Hmacropa)<br>(CSD BINWUT)                  | JCPAPR-11 | JASPC-11 | JCPPR-11 | JAPPR-11 | EBPY-11 |
|                                               | 5.017     | 6.222    | 6.763    | 10.795   | 18.338  |
| Ba(macropa- $\beta$ -alanine)<br>(CSD UMAHIC) | JCPAPR-11 | JCPPR-11 | JASPC-11 | JAPPR-11 | EBPY-11 |
|                                               | 5.623     | 6.340    | 6.750    | 9.725    | 18.068  |

Abbreviations for 11-coordinated: JCPAPR-11 - capped pentagonal antiprism; JCPPR-11 - capped pentagonal prism; JAPPR-11 - augmented pentagonal prism; JASPC-11 - augmented sphenocorona, EBPY-11 - enneagonal bipyramid.

**Table S6.** Bond lengths (Å) in metal coordination sphere in the published complexes Ba(Hmacropa) (CSD BINWUT) and Ba(macropa- $\beta$ -alanine) (CSD UMAHIC) and geometric parameters used for cavity size estimation (Å).

| Ba(Hmacropa)<br>(CSD BINWUT) |       | Ba(macropa- $\beta$ -alanine)<br>(CSD UMAHIC) |       |
|------------------------------|-------|-----------------------------------------------|-------|
| Ba1-O5                       | 2.809 | Ba1-O3                                        | 2.768 |
| Ba1-O7                       | 2.784 | Ba1-O1                                        | 2.743 |
| Ba1-N3                       | 2.930 | Ba1-N3                                        | 2.940 |
| Ba1-N4                       | 2.932 | Ba1-N6                                        | 2.915 |
| Ba1-O1                       | 2.834 | Ba1-O7                                        | 2.882 |
| Ba1-O2                       | 2.883 | Ba1-O8                                        | 2.924 |
| Ba1-O3                       | 2.846 | Ba1-O5                                        | 2.924 |
| Ba1-O4                       | 2.882 | Ba1-O6                                        | 2.916 |
| Ba1-N2                       | 3.014 | Ba1-N1                                        | 3.050 |
| Ba1-N1                       | 3.006 | Ba1-N2                                        | 2.995 |
| Ba1-O9                       | 2.925 | Ba1-O9                                        | 2.782 |
| R <sub>macro</sub>           | 2.81  | R <sub>macro</sub>                            | 2.82  |
| R <sub>total</sub>           | 2.89  | R <sub>total</sub>                            | 2.90  |

## 5. NMR study

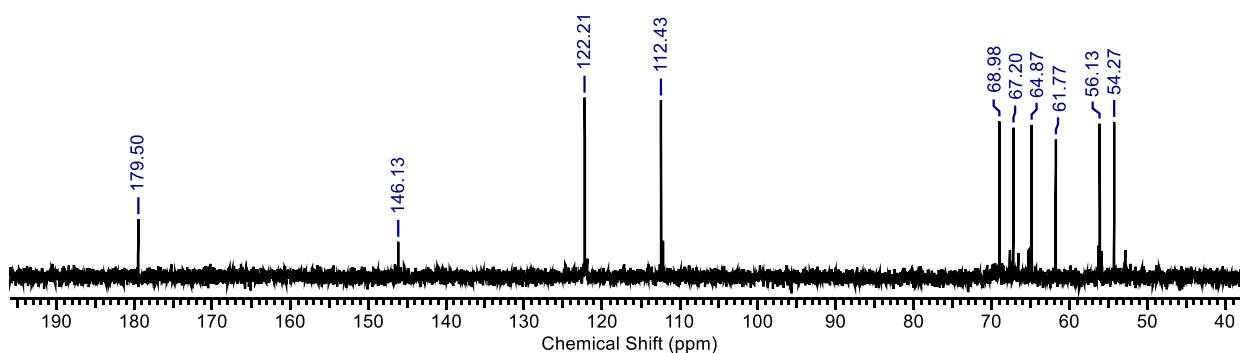

**Figure S24.**  $^{13}\text{C}$  NMR spectrum of the complex Ca(BADA-18) in  $\text{D}_2\text{O}$ .

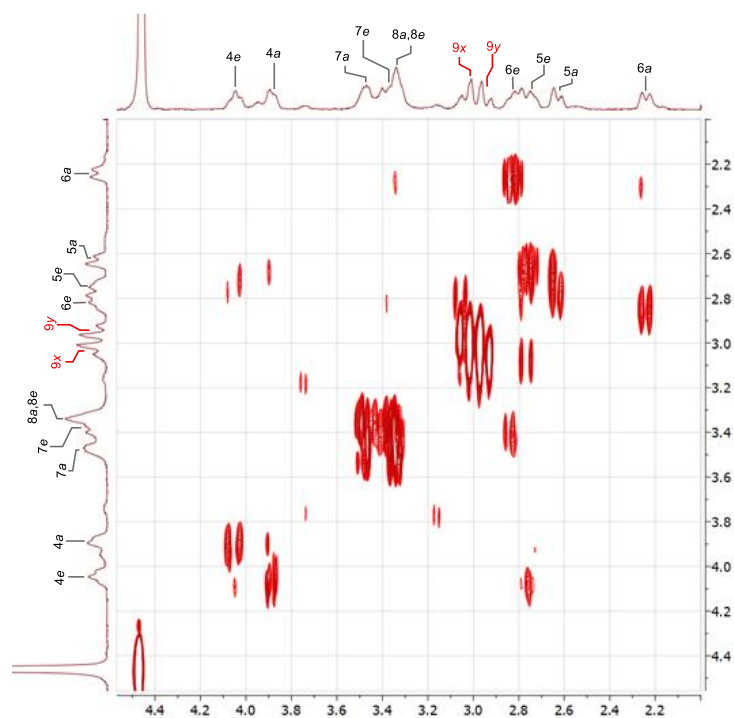

**Figure S25.**  $^1\text{H}$ - $^1\text{H}$  COSY NMR spectrum of the complex Ca(BADA-18) in  $\text{D}_2\text{O}$  (aliphatic region).

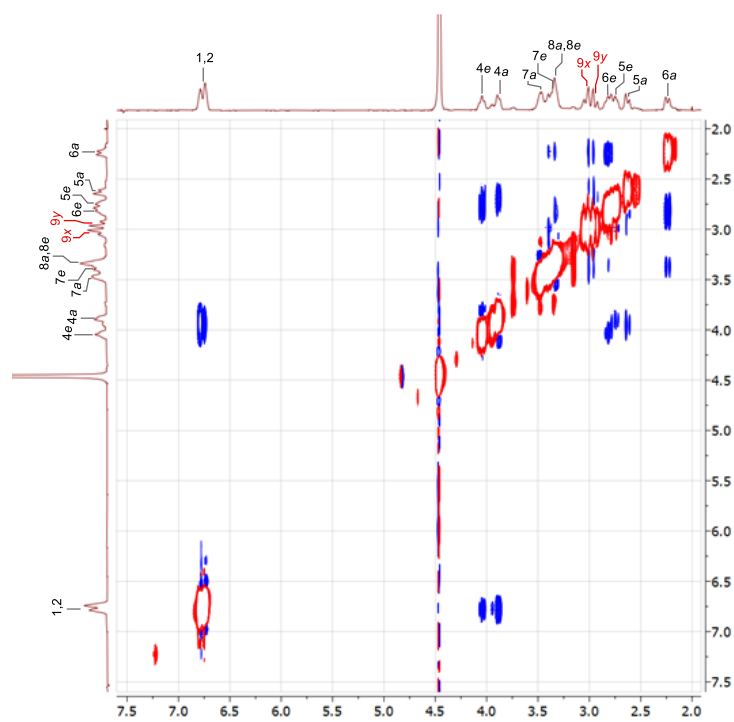

**Figure S26.**  $^1\text{H}$ - $^1\text{H}$  NOESY NMR spectrum of the complex Ca(BADA-18) in  $\text{D}_2\text{O}$ .

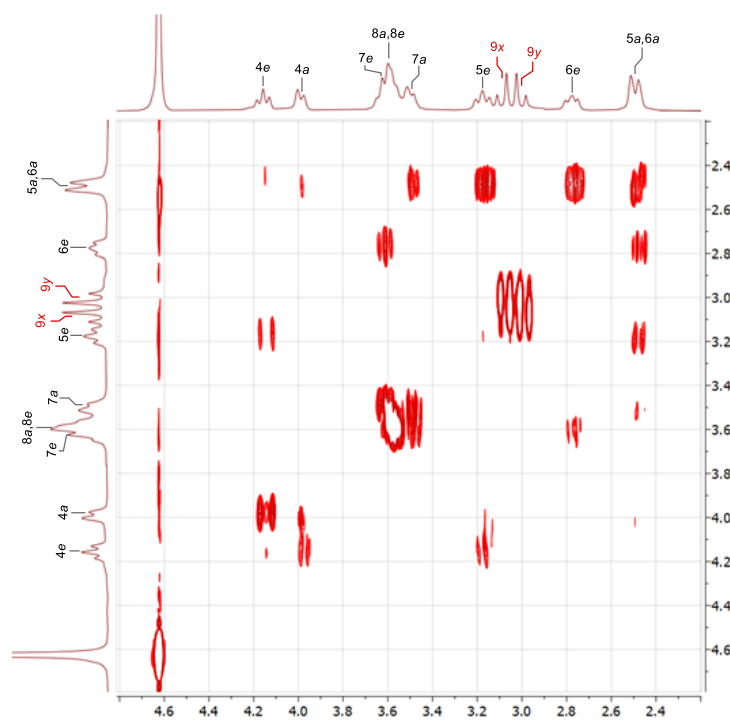

Figure S27.  $^1\text{H}$ - $^1\text{H}$  COSY NMR spectrum of the complex Ba(BADA-18) in  $\text{D}_2\text{O}$  (aliphatic region).

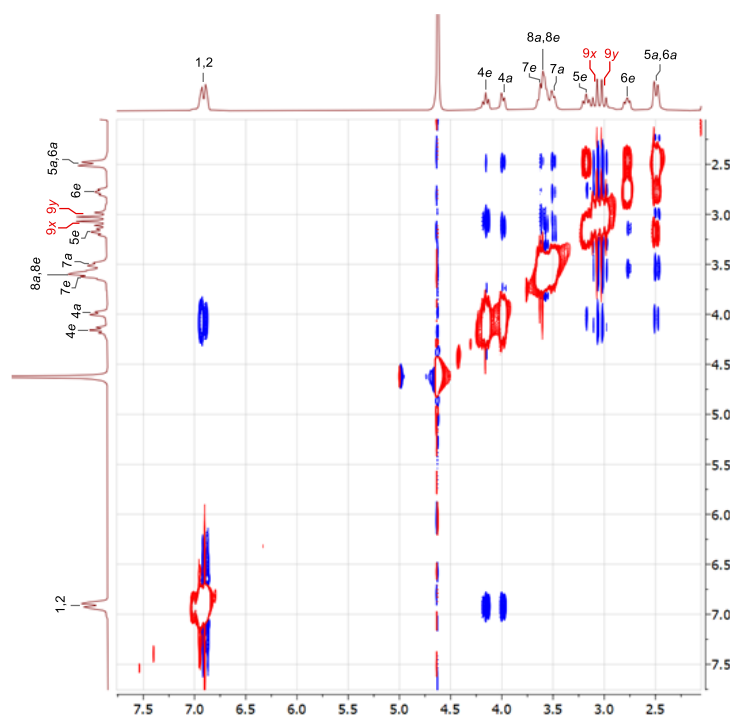

Figure S28.  $^1\text{H}$ - $^1\text{H}$  NOESY NMR spectrum of the complex Ba(BADA-18) in  $\text{D}_2\text{O}$ .

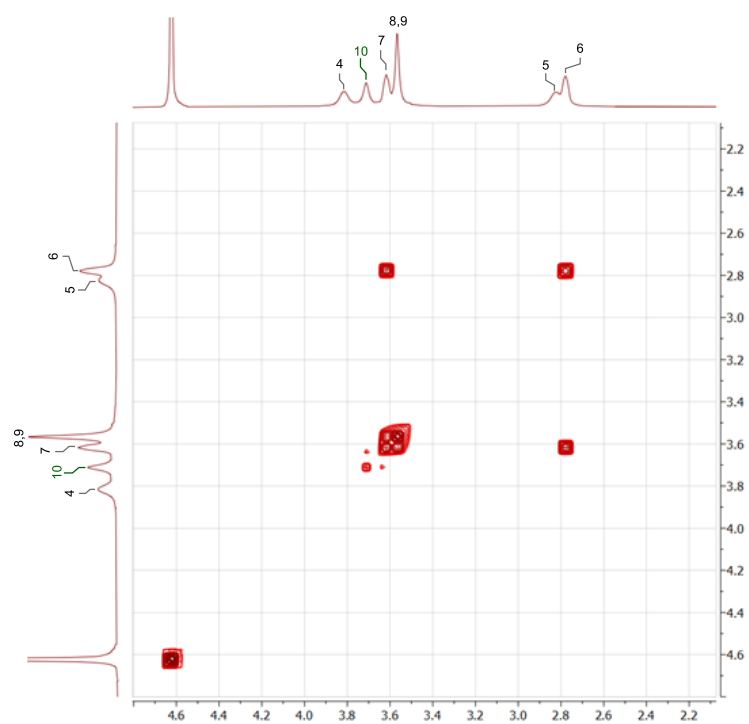

**Figure S29.** <sup>1</sup>H-<sup>1</sup>H COSY NMR spectrum of the complex Ca(BADPA-21) in D<sub>2</sub>O (aliphatic region).

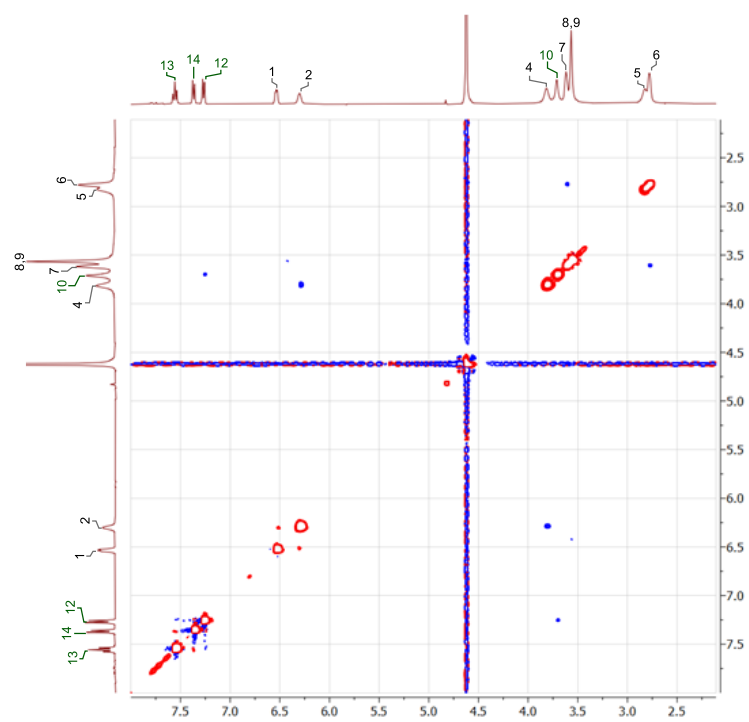

**Figure S30.** <sup>1</sup>H-<sup>1</sup>H NOESY NMR spectrum of the complex Ca(BADPA-21) in D<sub>2</sub>O.

## 6. Radiolabeling and *in vitro* stability

**Table S7.** Radiochemical yields (RCY, %) of [<sup>226</sup>Ra]Ra<sup>2+</sup> complexes with various chelators (25 °C, 1 min).

| c(L)    | BADA-18   | BADA-21   | BADPA-18 | BADPA-21 | macropa |
|---------|-----------|-----------|----------|----------|---------|
| 1 mM    | 0.2 ± 0.1 | 2.4 ± 0.4 | 18 ± 4   | 99 ± 6   | 98 ± 7  |
| 0.1 mM  |           |           |          | 60 ± 7   | 99 ± 8  |
| 0.01 mM |           |           |          | 5 ± 3    | 46 ± 7  |

**Table S8.** Radiochemical stability (%) of [<sup>226</sup>Ra]Ra<sup>2+</sup> complexes and [<sup>226</sup>Ra]Ra<sup>2+</sup> (blank) in FBS (37 °C, c(L) = 1 mM, V(complex) / V(FBS) = 1/9). Values represent the percentage of intact complex or, for the blank, the percentage of [<sup>226</sup>Ra]Ra<sup>2+</sup> unbound to serum proteins.

| Time    | [ <sup>226</sup> Ra]Ra <sup>2+</sup> (blank) | [ <sup>226</sup> Ra]Ra(BADPA-21) | [ <sup>226</sup> Ra]Ra(macropa) |
|---------|----------------------------------------------|----------------------------------|---------------------------------|
| 1 min   | 1.2 ± 0.4                                    |                                  |                                 |
| 1 hour  |                                              | 103 ± 6                          | 102 ± 9                         |
| 3 hours |                                              | 100 ± 10                         | 100 ± 8                         |
| 6 hours | 0.3 ± 0.1                                    |                                  |                                 |
| 1 day   |                                              | 106 ± 8                          | 103 ± 8                         |
| 2 days  |                                              | 98 ± 6                           | 98 ± 8                          |
| 11 days |                                              | 85 ± 8                           | 87 ± 6                          |

**Table S9.** Radiochemical stability (%) of [<sup>226</sup>Ra]Ra<sup>2+</sup> complexes in the presence of biologically relevant metal ions (37 °C, 1 day).

| M <sup>n+</sup>  | c(M <sup>n+</sup> ), mM | [ <sup>226</sup> Ra]Ra(BADPA-21) | [ <sup>226</sup> Ra]Ra(macropa) |
|------------------|-------------------------|----------------------------------|---------------------------------|
| Ca <sup>2+</sup> | 5                       | 95 ± 2                           | 97 ± 3                          |
| Zn <sup>2+</sup> | 0.1                     | 104 ± 13                         | 98 ± 1                          |
| Mg <sup>2+</sup> | 5                       | 97 ± 2                           | 100 ± 2                         |
| Cu <sup>2+</sup> | 0.1                     | 97 ± 2                           | 101 ± 5                         |
| Na <sup>+</sup>  | 150                     | 98 ± 1                           | 102 ± 4                         |
